# Supplementary figures and images for: Hydrogen production from buffer-free anaerobic fermentation liquid of waste activated sludge using microbial electrolysis system
Source: Royal Society of Chemistry journal article supplement (doi:10.1039/c6ra05037a), 2016-01-01

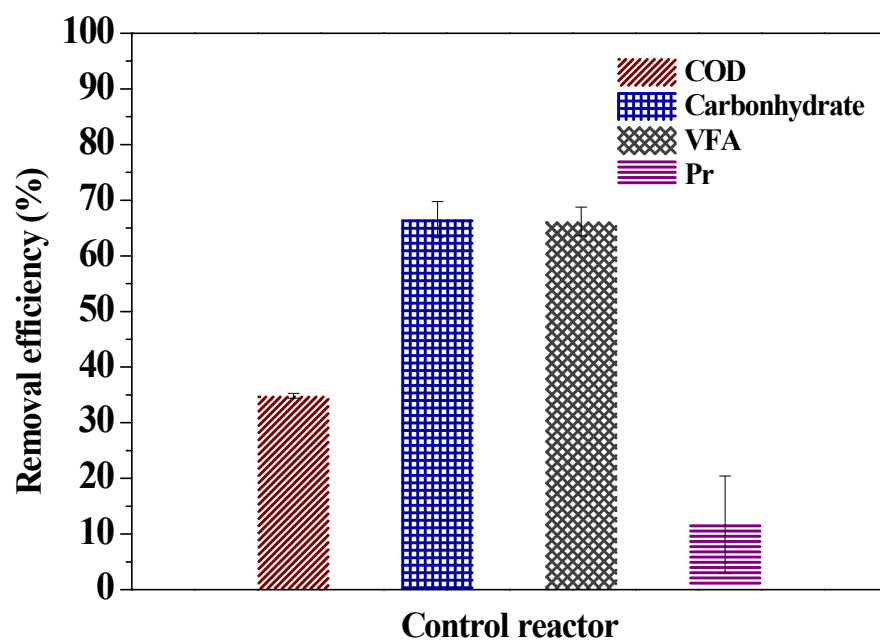

Figure S1 Degradation of SFL in control reactor

Supplement: c6ra05037a1.pdf [file c6ra05037a1.pdf]
